# Supplementary material
Source: PubMed Central journal article supplement (PMC2882235)

# Supplementary figure 1

a.

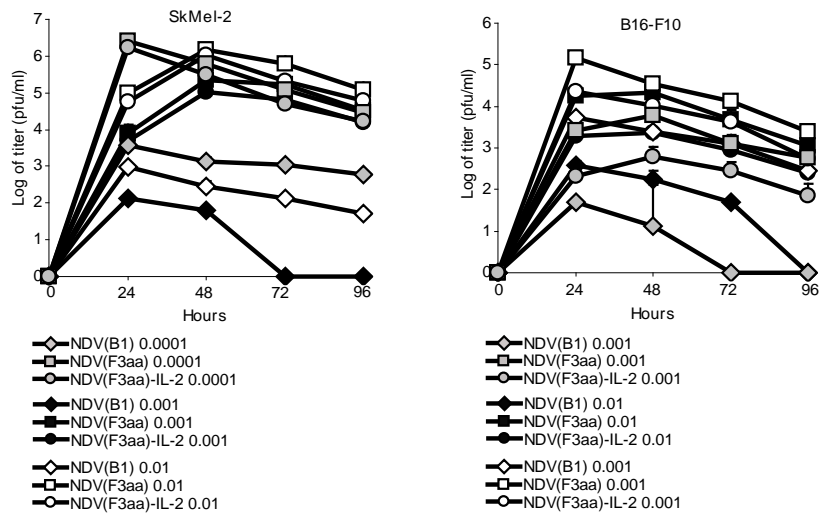

b.

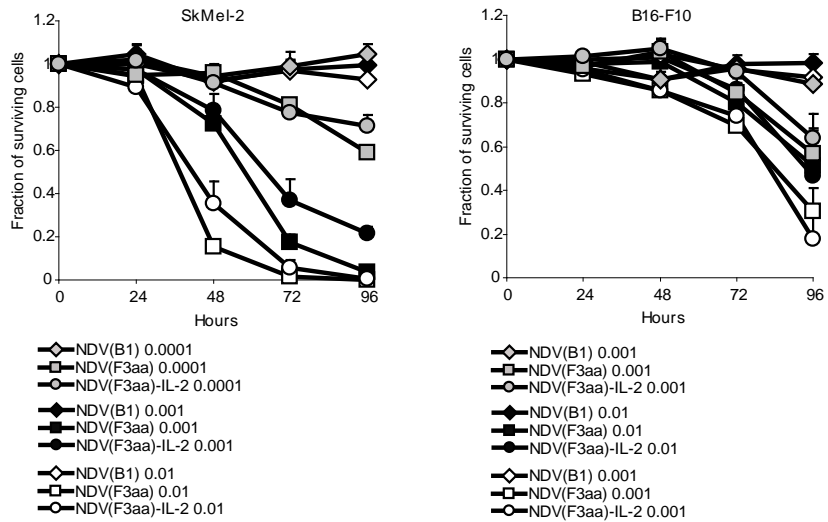

Supplement: NIHMS204120-supplement-1.pdf [file NIHMS204120-supplement-1.pdf]
